# Supplementary material for: Perovskite CH3NH3Pb(BrxI1−x)3 single crystals with controlled composition for fine-tuned bandgap towards optimized optoelectronic applications
Source: Royal Society of Chemistry journal article supplement (doi:10.1039/c6tc03592b), 2016-01-01
Supplement: c6tc03592b1.pdf [file c6tc03592b1.pdf]

## Electronic Supplementary Information

### Experimental Section

**Materials:** Hydrobromic acid (HBr) (48 wt.% in water), hydroiodic acid (HI) (57 wt.% in water), methylamine ( $\text{CH}_3\text{NH}_2$ ) (40 wt.% in water),  $\text{PbBr}_2$  (99%),  $\text{PbI}_2$  (99%), N,N-dimethylformamide (DMF, 99.9%) and  $\gamma$ -butyrolactone (GBL, 99%) were purchased from Sigma-Aldrich and used as received without further purification.

**Synthesis of  $\text{CH}_3\text{NH}_3\text{X}$  (X= Br, I) Crystals:**  $\text{CH}_3\text{NH}_3\text{Br}$  was synthesized by reacting  $\text{CH}_3\text{NH}_2$  and HBr with the molar ratio of 1.2:1. The HBr was added dropwise into the  $\text{CH}_3\text{NH}_2$  in a flask under nitrogen atmosphere in an iced bath for 2.5 h, the resulting solution was evaporated at 60 °C in a rotary evaporator to remove the solvent.  $\text{CH}_3\text{NH}_3\text{I}$  were synthesized with the same procedure as above except by replacing the HBr using HI. The white  $\text{CH}_3\text{NH}_3\text{X}$  (X= Br, I) crystalline powder was collected using Büchner funnel filtration after being washed for three times with anhydrous ethanol and recrystallized in anhydrous diethyl ether, then dried in a vacuum oven at 60 °C overnight.

**Single crystal growth process for  $\text{CH}_3\text{NH}_3\text{Pb}(\text{Br}_x\text{I}_{1-x})_3$ :** To grow the dual-halide perovskite single crystals  $\text{CH}_3\text{NH}_3\text{Pb}(\text{Br}_x\text{I}_{1-x})_3$  ( $x = 0\sim 1$ ), precursor solutions were prepared first. The solution concentration was controlled at 0.7 M in DMF for  $\text{CH}_3\text{NH}_3\text{PbBr}_3$  and 1.3 M in GBL for  $\text{CH}_3\text{NH}_3\text{PbI}_3$ . Specifically, equimolar mixture of the  $\text{CH}_3\text{NH}_3\text{Br}$  and  $\text{PbBr}_2$  were dissolved in DMF at 50 °C for  $\text{CH}_3\text{NH}_3\text{PbBr}_3$ , equimolar mixture of the  $\text{CH}_3\text{NH}_3\text{I}$  and  $\text{PbI}_2$  in GBL for  $\text{CH}_3\text{NH}_3\text{PbI}_3$ . For  $\text{CH}_3\text{NH}_3\text{Pb}(\text{Br}_x\text{I}_{1-x})_3$ , measured volume of  $\text{CH}_3\text{NH}_3\text{PbBr}_3$  (0.7 M) solution and  $\text{CH}_3\text{NH}_3\text{PbI}_3$  (1.3 M) were mixed to form the double-halide precursor solution with desired Br:I ratio. (Supplementary Table 1). The  $\text{CH}_3\text{NH}_3\text{Pb}(\text{Br}_x\text{I}_{1-x})_3$  solution were heated to 95 °C and maintained

at the temperature until desired  $\text{CH}_3\text{NH}_3\text{Pb}(\text{Br}_x\text{I}_{1-x})_3$  single crystals formed.

**The fabrication of photodetector:** Planar-type photodetectors were fabricated by depositing ~200 nm interdigital Au electrodes via vacuum evaporation on the single crystalline  $\text{CH}_3\text{NH}_3\text{Pb}(\text{Br}_x\text{I}_{1-x})_3$ , respectively. Each electrode consists of a group of 15 fine Au wires (2 mm in length, 50  $\mu\text{m}$  in width). The effective illumination area was controlled at  $\sim 3 \text{ mm}^2$ .

**Characterizations:** Powder XRD patterns were collected using a Rigaku (Smartlab-9kW) X-ray diffractometer equipped with a Cu  $K\alpha$  X-ray ( $\lambda = 1.54186 \text{ \AA}$ ) tube operated at 40 kV and 30 mA. The  $\text{CH}_3\text{NH}_3\text{Pb}(\text{Br}_x\text{I}_{1-x})_3$  powder was produced by grinding a large piece of crystal into fine powder; Vis-NIR diffuse reflectance spectrum was measured at room temperature using a Vis-NIR spectrophotometer (PerkinElmer Lambda 950) with an integrating sphere attachment operating in the 400~1000 nm region. A highly refined barium sulfate ( $\text{BaSO}_4$ ) plate was used as the standard (100% reflectance); The photoresponse characteristics for the  $\text{CH}_3\text{NH}_3\text{Pb}(\text{Br}_x\text{I}_{1-x})_3$  photodetectors were collected by a Keithley 2400 source meter under various bias voltage and LED light illumination.

**The procedures to extract the bandgaps:** The optical absorption coefficient ( $\alpha$ ) is calculated using reflectance data according to the Kubelka–Munk equation,  $F(R) = \alpha/S = (1 - R)^2/2R$ , where  $R$  is the percentage of reflected light,  $S$  is the scattering coefficient. The incident photon energy ( $h\nu$ ) and the optical band gap ( $E_g$ ) are related to the transformed Kubelka–Munk function,  $\alpha h\nu^p = A(h\nu - E_g)^n$ , where  $A$  and  $p$  are constants. As all three kinds of  $\text{CH}_3\text{NH}_3\text{PbX}_3$  ( $x = \text{Cl, Br, I}$ ) are direct-bandgap semiconductor materials, the  $n$  value is 1/2. By extrapolating the linear region of the  $[F(R)h\nu]^2$  vs.  $h\nu$  curve, the intercept is shown in Fig. S2,  $E_g$  is established.<sup>1-3</sup>



**Table 1** The mixed volumetric ratio of  $\text{CH}_3\text{NH}_3\text{PbBr}_3$ ,  $\text{CH}_3\text{NH}_3\text{PbI}_3$  for the  $\text{CH}_3\text{NH}_3\text{Pb}(\text{Br}_x\text{I}_{1-x})_3$  solution.

| dual-halide<br>perovskites                                     | composition<br>(x) | $\text{CH}_3\text{NH}_3\text{PbBr}_3$ | $\text{CH}_3\text{NH}_3\text{PbI}_3$ |
|----------------------------------------------------------------|--------------------|---------------------------------------|--------------------------------------|
|                                                                |                    | (0.7M)<br>Volume (mL)                 | (1.3M)<br>Volume (mL)                |
| $\text{CH}_3\text{NH}_3\text{Pb}(\text{Br}_x\text{I}_{1-x})_3$ | 0                  | 0                                     | 15                                   |
|                                                                | 0.08               | 2                                     | 13                                   |
|                                                                | 0.21               | 5                                     | 10                                   |
|                                                                | 0.38               | 8                                     | 7                                    |
|                                                                | 0.52               | 10                                    | 5                                    |
|                                                                | 0.6                | 11                                    | 4                                    |
|                                                                | 0.68               | 12                                    | 3                                    |
|                                                                | 0.78               | 13                                    | 2                                    |
|                                                                | 0.87               | 14                                    | 1                                    |
|                                                                | 1                  | 15                                    | 0                                    |

Table S2. Comparison of the photocurrent response speed of the photodetector as reported in literature and our measurements.

| Material                                                                                                                   | Rise time | Fall time | Reference    |
|----------------------------------------------------------------------------------------------------------------------------|-----------|-----------|--------------|
| CH <sub>3</sub> NH <sub>3</sub> PbBr <sub>3</sub><br>single crystal                                                        | 70 us     | 150 us    | 46           |
| CH <sub>3</sub> NH <sub>3</sub> PbBr <sub>3</sub><br>single crystal                                                        |           | 25 us     | 47           |
| CH <sub>3</sub> NH <sub>3</sub> PbBr <sub>3</sub><br>nanowires                                                             | 120 ms    | 86 ms     | 48           |
| CH <sub>3</sub> NH <sub>3</sub> PbI <sub>3</sub> –<br>CH <sub>3</sub> NH <sub>3</sub> PbBr <sub>3</sub><br>heterojunctions | 120 ms    | 94 ms     | 49           |
| MAPb(Br <sub>0.78</sub> I <sub>0.22</sub> ) <sub>3</sub><br>single crystal                                                 | 3.4 ms    | 3.6 ms    | Present work |

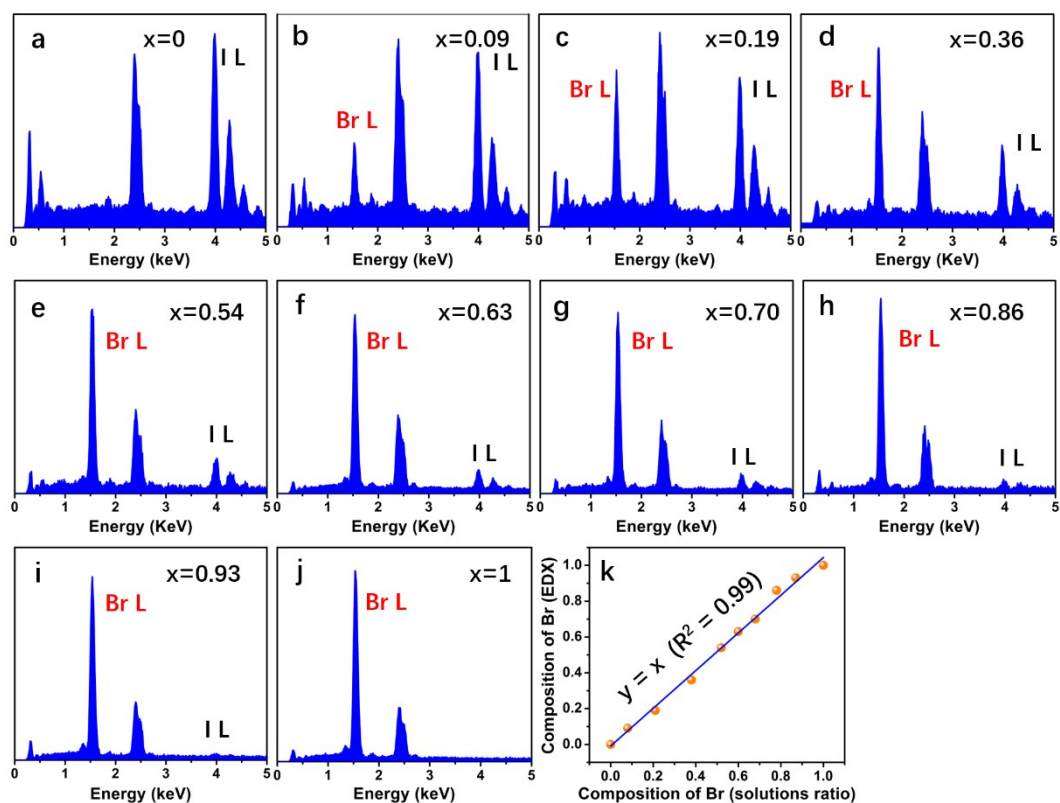

Fig. S1. (a-j) EDX spectra of MAPb(Br<sub>x</sub>I<sub>1-x</sub>)<sub>3</sub> ( $x = 0, 0.08, 0.21, 0.38, 0.52, 0.60, 0.68, 0.78, 0.87$  and 1) samples. The corresponding  $x$  value was calculated using the Br K and I L shell peaks, which are shown in the inset ( $x = 0, 0.09, 0.19, 0.36, 0.54, 0.63, 0.70, 0.86, 0.93$  and 1). (k) The correlation of the  $x$  values determined by the ratio of precursor solution between the  $x$  values determined by the EDX spectra.

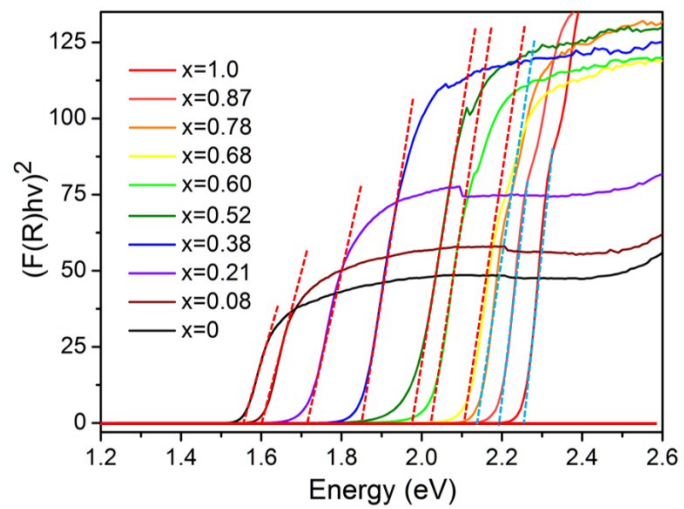

Fig. S2 The K-M plots with the tangent line to determine the bandgap.

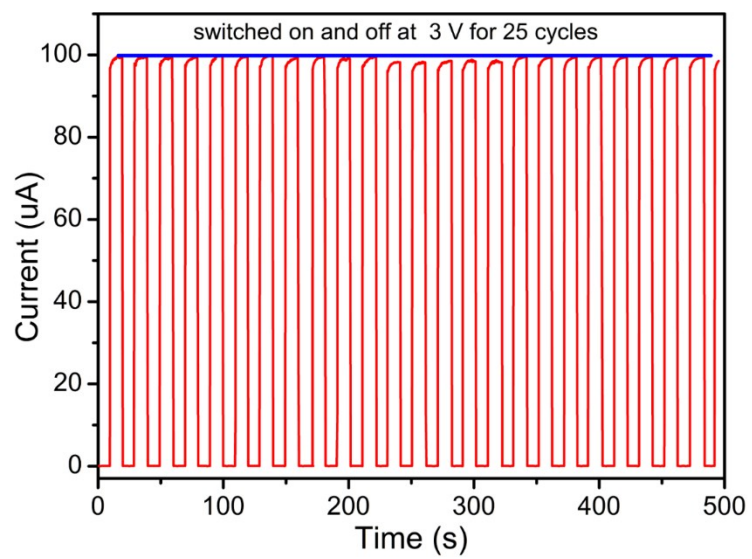

Fig. S3 Photocurrent response measured at 3 V bias for 25 cycles under the illumination (460 nm, 7.96 mW cm<sup>-2</sup>) switched on and off.



## references

- 1 T. J. McCarthy, T. A. Tanzer and M. G. Kanatzidis, *J. Am. Chem. Soc.*, 1995, **117**, 1294-1301.
- 2 H. Lin, C. Huang, W. Li, C. Ni, S. Shah and Y. Tseng, *Applied Catalysis B: Environmental*, 2006, **68**, 1-11.
- 3 S. Pang, H. Hu, J. Zhang, S. Lv, Y. Yu, F. Wei, T. Qin, H. Xu, Z. Liu and G. Cui, *Chem. Mater.* 2014, **26**, 1485-1491.
